# Supplementary material for: SOCS2 correlates with malignancy and exerts growth-promoting effects in prostate cancer
Source: PubMed Central journal article supplement (PMC3907181; doi:10.1530/erc-13-0446), 2014-04

# Hoefer et al. Figure S1

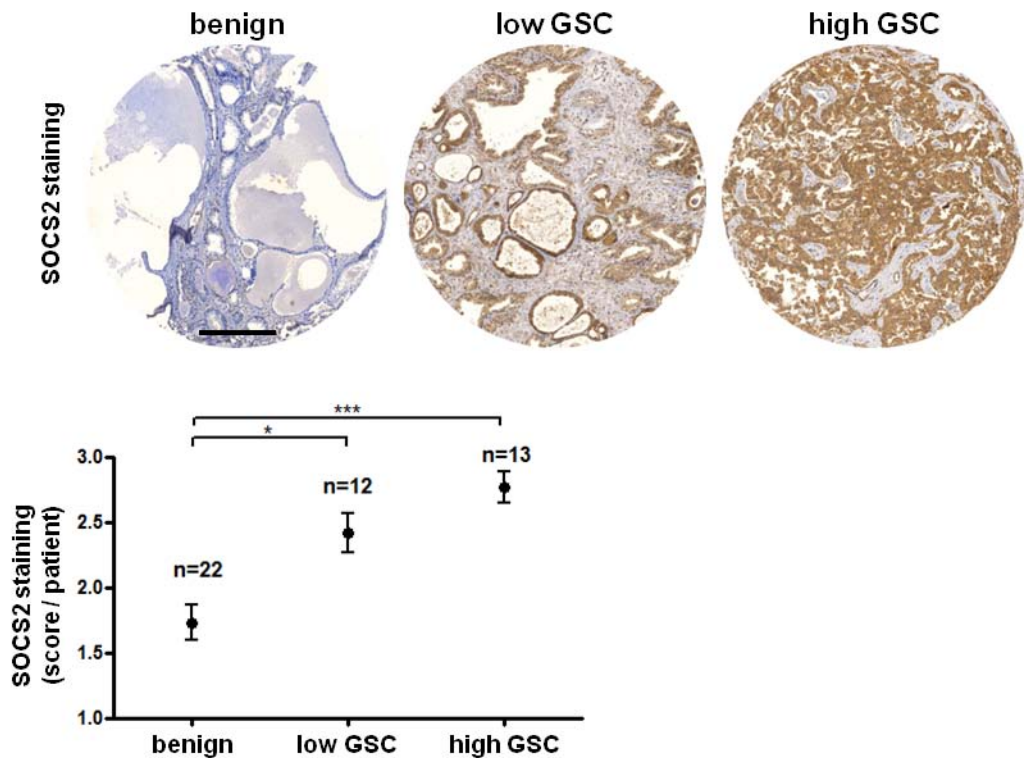

Supplement: supp_ERC-13-0446_Supplementary_figure_1.pdf [file supp_ERC-13-0446_Supplementary_figure_1.pdf]
