# Supplementary material for: SOCS2 correlates with malignancy and exerts growth-promoting effects in prostate cancer
Source: PubMed Central journal article supplement (PMC3907181; doi:10.1530/erc-13-0446), 2014-04

# Hoefler et al. Figure S2

## A

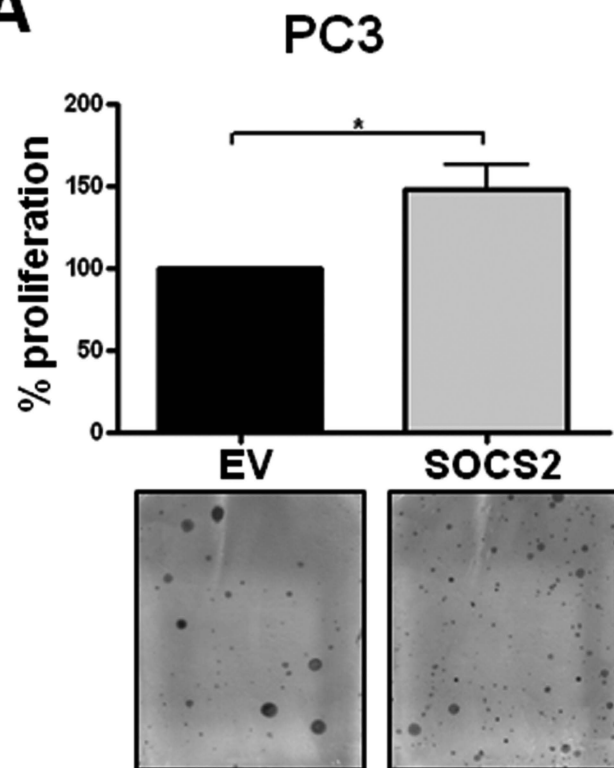

## B

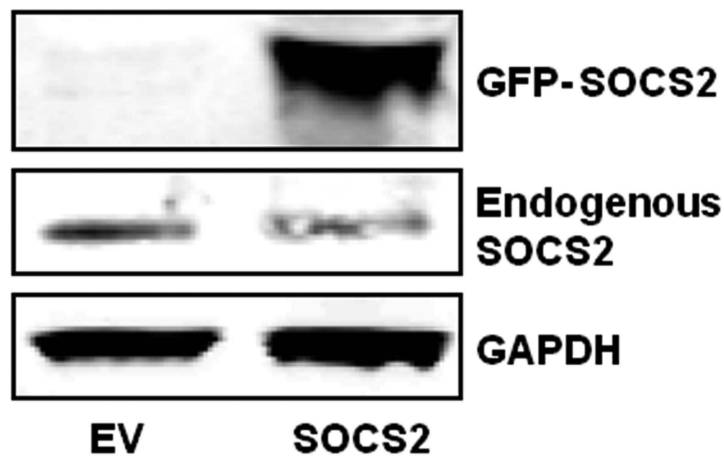

Supplement: supp_ERC-13-0446_Supplementary_figure_2.pdf [file supp_ERC-13-0446_Supplementary_figure_2.pdf]
