# Supplementary material for: SOCS2 correlates with malignancy and exerts growth-promoting effects in prostate cancer
Source: PubMed Central journal article supplement (PMC3907181; doi:10.1530/erc-13-0446), 2014-04
Supplement: supp_ERC-13-0446_Supplementary_information_1.pdf [file supp_ERC-13-0446_Supplementary_information_1.pdf]

## Sequences of the used shRNA, primers, probes

**shRNA sequences (sense, antisense sequences targeting SOCS2 or luciferase are underlined)**

**shSOCS2-1**

GATCCCCGAAGCCAAAGAGAAATTAATTCAAGAGATTAATTTCTCTTTGGCTTCTTTTTGGAAA

**shSOCS2-3**

GATCCCCGCTAAAGACAAGAATATCATTCAAGAGATGATATTCTTGTCTTTAGCTTTTTGGAAA

**shLuc**

GATCCCCCTTACGCTGAGTACTTCGATTCAAGAGATCGAAGTACTCAGCGTAAGTTTTGGAAA

## Primer and probes for qRT-PCR

**SOCS2 forward**

CAGATGTGCAAGGATAAGCGG

**SOCS2 reverse**

CAGATAAAGGTGAACAGTGCCG

**SOCS2 probe**

6-FAM-CAGGTCCAGAAGCCCCCGG-TAMRA

**TBP forward**

5'-CACGAACCACGGCACTGATT-3';

**TBP reverse**

TTTTCTTGCTGCCAGTCTGGAC

**TBP probe**

6-FAM-TCTTCACTCTTGGCTCCTGTGCACA-TAMRA

## Primers and probes for methylation analysis

**SOCS2 forward**

AATTAAACTCCCGAACTCGAA

**SOCS2 reverse**

GTTGGGTTTGCGGGGTTT

**SOCS2 probe**

6-FAM-AAACGTTCGAACGCCTCCC-TQ2

**ACTB forward**

CCAATAAAACCTACTCCTCCCTTAA

**ACTB reverse**

GTGATGGAGGAGGTTTAGTAAGTT

**ACTB probe**

R6G-ACCACCACCAACACACAATAACAAACACA-BBQ-650
